# Supplementary material for: KIF4A and PP2A–B56 form a spatially restricted feedback loop opposing Aurora B at the anaphase central spindle
Source: PubMed Central journal article supplement — J Cell Biol. 2014 Dec 22;207(6):683–93. doi: 10.1083/jcb.201409129 (PMC4274259; doi:10.1083/jcb.201409129), 2014-12-22
Supplement: supp_jcb.201409129_JCB_201409129_sm.pdf [file supp_jcb.201409129_JCB_201409129_sm.pdf]

Nunes Bastos et al., <http://www.jcb.org/cgi/content/full/jcb.201409129/DC1>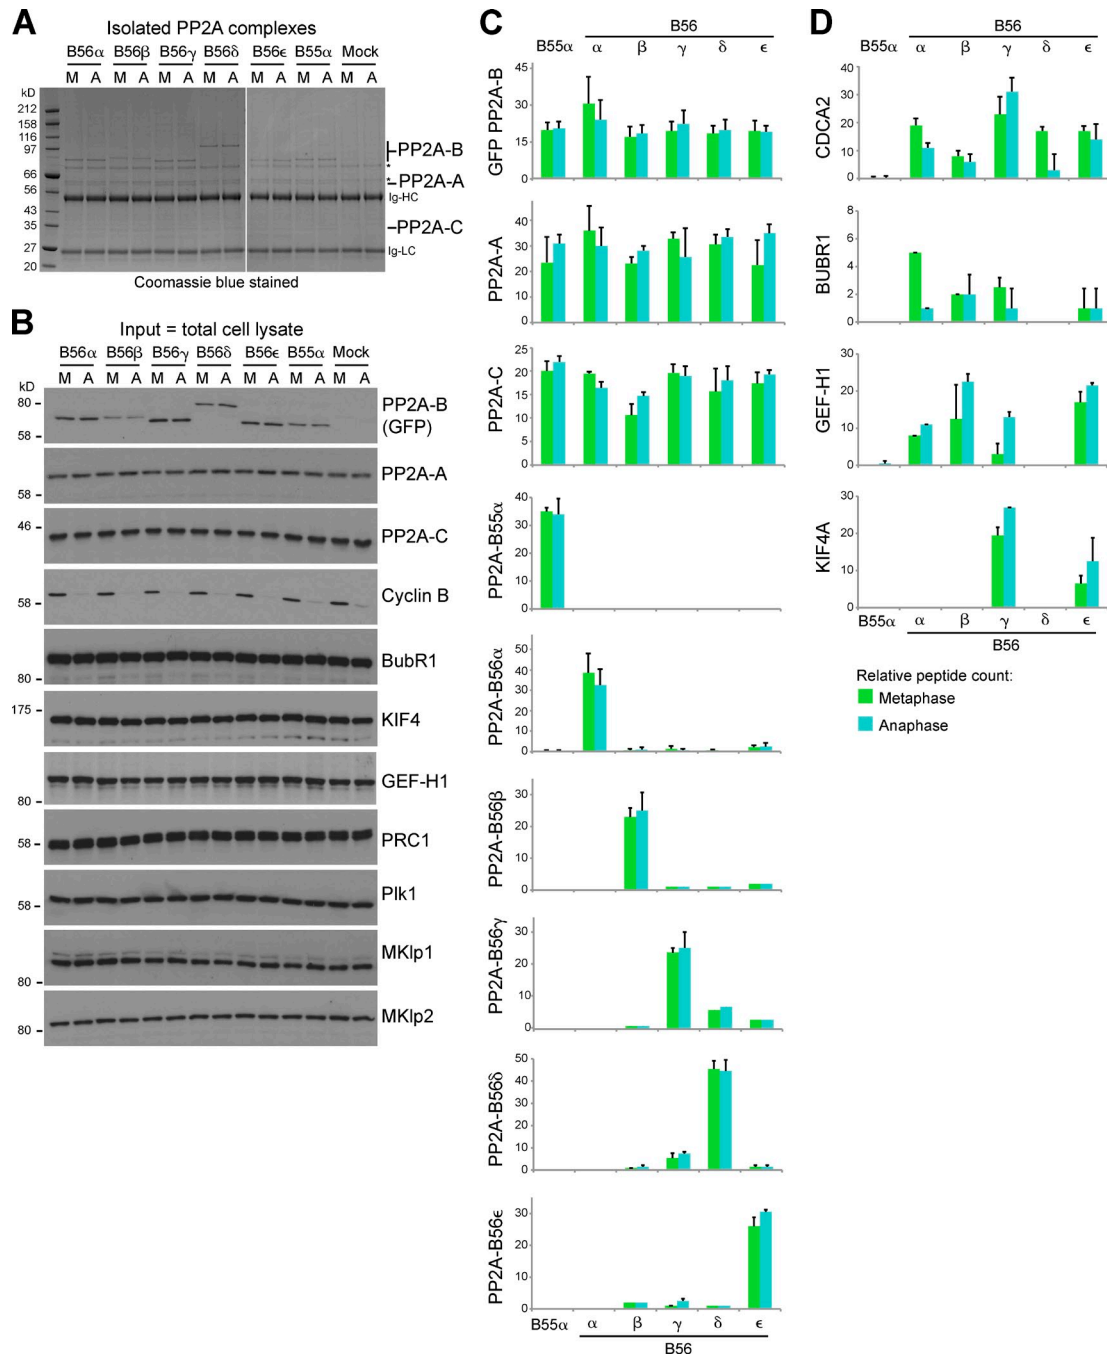

Figure S1. **Analysis of the subunit composition of PP2A-B56 complexes from metaphase and anaphase cells.** (A) PP2A-B56 and -B55 $\alpha$  complexes were immune precipitated using GFP antibodies from synchronized HeLa cells in metaphase (M) and anaphase (A). Untransfected cells were used as a negative control (Mock). A Coomassie blue-stained gel of the complexes representative of three independent experiments is shown. White lines indicate that intervening lanes have been spliced out. Asterisks mark nonspecifically bound proteins. HC, immunoglobulin heavy chain; LC, immunoglobulin light chain. (B) The input fractions corresponding to the samples in Fig. 1 B were analyzed by blotting with the antibodies shown in the figure. Cyclin B was used to confirm the metaphase and anaphase states of the extracts. (C and D) Mass spectrometry analysis of PP2A-B56 complexes showing the relative abundance of core PP2A subunits (C), or associated proteins were calculated using MaxQuant (D). The number of peptides identified in metaphase and anaphase samples is plotted as a measure of relative protein abundance (means  $\pm$  SEM,  $n = 3$ ). Similar data were collected for PP2A complexes isolated in four independent experiments.

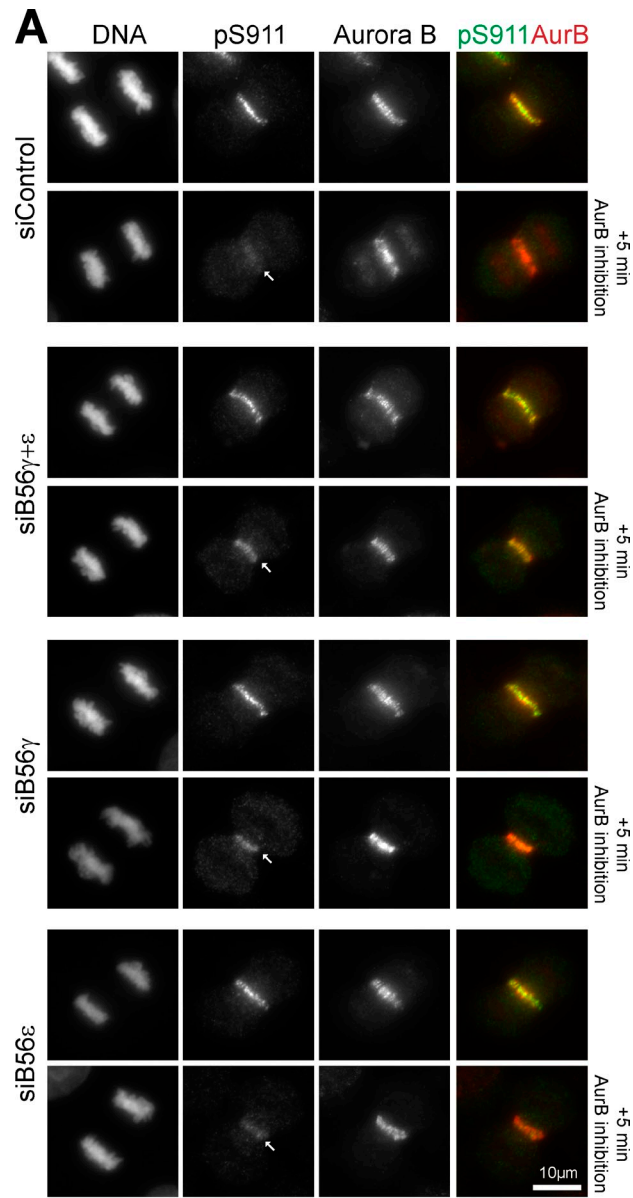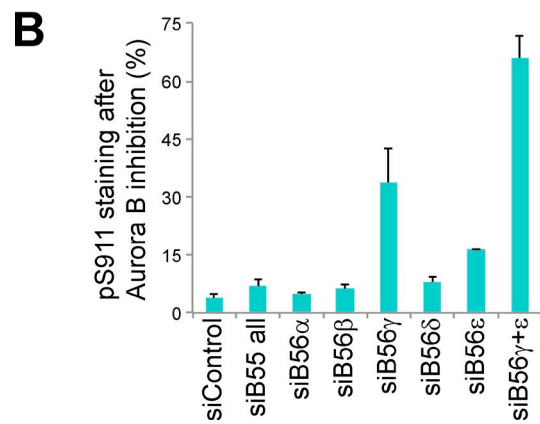

Figure S2. **PP2A-B56 $\gamma$  is a KIF4A pT799 and MKlp1 pS911 phosphatase.** (A) HeLa cells were treated with control, combined PP2A-B56 $\gamma$ , and - $\epsilon$ , or PP2A-B56 $\gamma$  or - $\epsilon$  siRNA for 36 h, arrested in interphase with 2 mM thymidine for 18 h, and then released to allow cells to enter mitosis. After 10 h, when the peak of anaphase cells was observed, Aurora B was inhibited for 5 min with 1  $\mu$ M ZM447439. The cells were fixed and then stained for DNA, mouse anti-Aurora B, and rabbit anti-MKlp1 pS911. Arrows indicate the central spindle region. (B) Central spindle pS911 staining intensity after 5 min Aurora B inhibition was scored in anaphase cells after PP2A-B55 and -B56 subunit depletion in the combinations indicated (means  $\pm$  SEM,  $n = 3$  measuring >100 cells per condition). siControl, control siRNA.

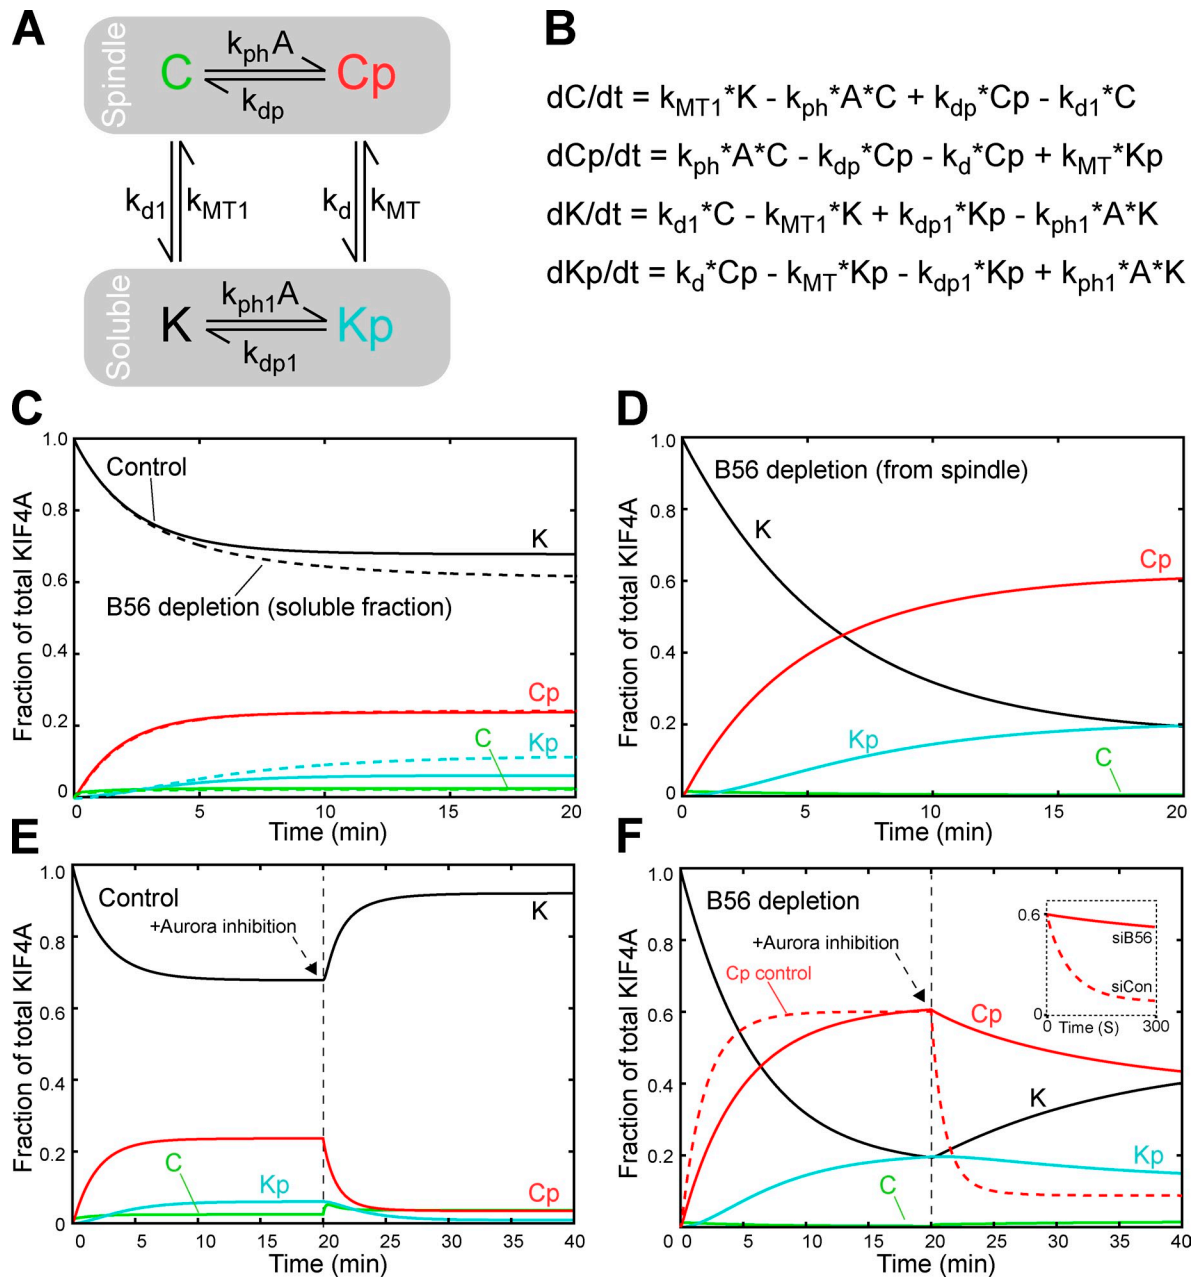

Figure S3. **A model describing the regulation of KIF4A by Aurora B and PP2A-B56.** (A) The biochemical reactions providing the basis for the mathematical modeling are described. KIF4A is present in soluble cytoplasmic (K) and central spindle-associated fractions (C), which can also be phosphorylated (Kp and Cp). Aurora B kinase is described by the term A,  $k_{ph}$  and  $k_{dp}$  are rate constants for phosphorylation and dephosphorylation of KIF4A, and  $k_{MT}$  and  $k_d$  are rate constants for microtubule binding and release of KIF4A at the spindle. (B) The time-dependent change of each component is described by a nonlinear ordinary differential equation. Each term on the right hand side of the equation corresponds to a biochemical reaction. Parameters were defined based on the assumption that  $k_{ph} \gg k_{ph1}$  because Aurora B is predominantly spindle associated and  $k_{dp} > k_{dp1}$  because B56 is enriched at spindle but also present in cytoplasm. Phosphorylation does not alter microtubule binding, so  $k_{MT} = k_{MT1}$ ; however, phosphorylation increases microtubule residence time, so  $k_d < k_{d1}$ . (C) Simulation of KIF4A behavior in control cells entering anaphase [ $A = 1$ ,  $k_{MT1} = 0.2$ ,  $k_{d1} = 5$ ,  $k_{ph} = 10$ ,  $k_{dp} = 1.0$ ,  $k_{MT} = 0.2$ ,  $k_d = 0.1$ ,  $k_{ph1} = 0.001$ , and  $k_{dp1} = 0.2$ ]. Because all available KIF4A is cytoplasmic at anaphase onset,  $K = 1$  provides the starting condition for the simulation. A 95% reduction in soluble B56,  $k_{dp1} = 0.01$  is plotted in the dotted lines. (D) To mimic 95% depletion of B56 $\gamma$  and  $\epsilon$ ,  $k_{dp}$  is reduced to 0.05, and because it is assumed to contribute 50% of soluble PP2A-B56,  $k_{dp1}$  is reduced to 0.1. (E and F) To simulate the requirement for Aurora B, A was reduced to 0.1 equal to 90% inhibition. In F, to facilitate comparison with the experiment in Fig. 4 C, the control curve has been normalized to the same value as the B56 depletion condition and is plotted as a dotted red line. An enlarged boxed region shows a time window comparable to the experimental data in Fig. 4 C. siCon, control siRNA.

Table S1. siRNA duplexes used to target PP2A and KIF4A

| Gene    | Accession | Company                  | Catalog no. | Sequence 5'→3'       |
|---------|-----------|--------------------------|-------------|----------------------|
| PPP2R2A | NM_002717 | Thermo Fisher Scientific | J-004824-06 | CAUACCAGGUGCAUGAAUA  |
| PPP2R2A | NM_002717 | Thermo Fisher Scientific | J-004824-07 | GUUAGAGAUCCUACUACA   |
| PPP2R2A | NM_002717 | Thermo Fisher Scientific | J-004824-08 | GCAAGUGGCAAGCGAAAGA  |
| PPP2R2A | NM_002717 | Thermo Fisher Scientific | J-004824-09 | AGACAUAAACCCUAGAAGCA |
| PPP2R5A | NM_006243 | Thermo Fisher Scientific | J-009352-07 | GCUCAAAGAUCCACUUCA   |
| PPP2R5A | NM_006243 | Thermo Fisher Scientific | J-009352-08 | CAAUACAAGUGCCGAAUAA  |
| PPP2R5A | NM_006243 | Thermo Fisher Scientific | J-009352-09 | UGAAUGAACUGGUUGAGUA  |
| PPP2R5A | NM_006243 | Thermo Fisher Scientific | J-009352-10 | GGAAUUGAAUGGCAAGCUU  |
| PPP2R5B | NM_006244 | Thermo Fisher Scientific | J-009366-05 | CGCAUGAUCUCAGUGAAUA  |
| PPP2R5B | NM_006244 | Thermo Fisher Scientific | J-009366-06 | UCAAGUCGUGUCUGUCUU   |
| PPP2R5B | NM_006244 | Thermo Fisher Scientific | J-009366-07 | CAAACCAUCGUUACACUGA  |
| PPP2R5B | NM_006244 | Thermo Fisher Scientific | J-009366-08 | GAACAAUGAGUAUAUCCUA  |
| PPP2R5C | NM_178587 | Thermo Fisher Scientific | J-009433-05 | GGAAUUUCCUUACCACUAA  |
| PPP2R5C | NM_178587 | Thermo Fisher Scientific | J-009433-06 | GGAAUGAACCACCGUUA    |
| PPP2R5C | NM_178587 | Thermo Fisher Scientific | J-009433-07 | CAUCAGAAUUUGUGAAGAU  |
| PPP2R5C | NM_178587 | Thermo Fisher Scientific | J-009433-08 | CAGAAGUAGUCCAUAUGUU  |
| PPP2R5D | NM_180977 | Thermo Fisher Scientific | J-009799-06 | GUACAUCGACCAGAAGUUU  |
| PPP2R5D | NM_180977 | Thermo Fisher Scientific | J-009799-07 | UCCAUGGACUGAUCUAUAA  |
| PPP2R5D | NM_180977 | Thermo Fisher Scientific | J-009799-08 | UGACUGAGCCGGUAAUUGU  |
| PPP2R5D | NM_180977 | Thermo Fisher Scientific | J-009799-09 | GUAGGCAGAUCAACCACAU  |
| PPP2R5E | NM_006246 | Thermo Fisher Scientific | J-008531-06 | UUAUUGAACUGGUGGACUA  |
| PPP2R5E | NM_006246 | Thermo Fisher Scientific | J-008531-07 | GCACAGCUGGCAUUAUUGUA |
| PPP2R5E | NM_006246 | Thermo Fisher Scientific | J-008531-08 | GACACGCUAUCUGAUCUUA  |
| PPP2R5E | NM_006246 | Thermo Fisher Scientific | J-008531-09 | GGAAUAAAGUAGACGGAUUU |
| KIF4A   | NM_012310 | QIAGEN                   | Custom      | CAGGUCCAGACUACUACUC  |
| Control | None      | Thermo Fisher Scientific | Custom      | CGUACGCGGAAUACUUCGA  |

Accession numbers were obtained from GenBank.

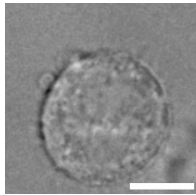

Video 1. **Central spindle localization of PP2A–B56 $\beta$ .** HeLa cells expressing an EGFP-tagged PP2A–B56 $\beta$  subunit were imaged at 1-min intervals for 20 min from 1 min before the onset of anaphase using a spinning-disk confocal microscope. A maximum intensity projection of the GFP signal, 17 planes spaced by 0.6  $\mu$ m through the cell volume, is shown with grayscale and a heatmap scale together with a single brightfield image taken at the cell equator. PP2A–B56 $\beta$  accumulated at the central spindle 3–4 min after anaphase onset, spread out toward the cell cortex during furrowing, and then concentrated at the midbody. Time is in minutes relative to metaphase–anaphase transition. Supplemental to Fig. 1 E. Bar, 10  $\mu$ m.

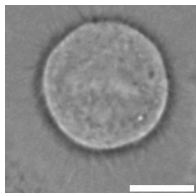

Video 2. **Central spindle localization of PP2A–B56 $\gamma$ .** HeLa cells expressing an EGFP-tagged PP2A–B56 $\gamma$  subunit were imaged at 1-min intervals for 20 min from 1 min before the onset of anaphase using a spinning-disk confocal microscope. A maximum intensity projection of the GFP signal, 17 planes spaced by 0.6  $\mu$ m through the cell volume, is shown with grayscale and a heatmap scale together with a single brightfield image taken at the cell equator. PP2A–B56 $\gamma$  accumulated at the central spindle 3–4 min after anaphase onset but was absent from the cell cortex and then became increasingly concentrated at the midbody. Time is in minutes relative to metaphase–anaphase transition. Supplemental to Fig. 1 E. Bar, 10  $\mu$ m.

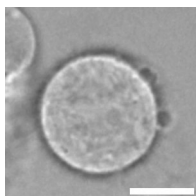

Video 3. **Central spindle localization of PP2A–B56 $\epsilon$ .** HeLa cells expressing an EGFP-tagged PP2A–B56 $\epsilon$  subunit were imaged at 1-min intervals for 20 min from 1 min before the onset of anaphase using a spinning-disk confocal microscope. A maximum intensity projection of the GFP signal, 17 planes spaced by 0.6  $\mu$ m through the cell volume, is shown with grayscale and a heatmap scale together with a single brightfield image taken at the cell equator. PP2A–B56 $\epsilon$  accumulated at the central spindle 3–4 min after anaphase onset but was absent from the cell cortex and became increasingly concentrated at the midbody. The cytoplasmic signal is greater than seen for B56 $\gamma$ , which otherwise shows a similar pattern of localization. Time is in minutes relative to metaphase–anaphase transition. Supplemental to Fig. 1 E. Bar, 10  $\mu$ m.

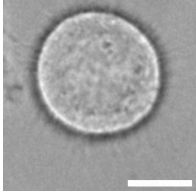

Video 4. **Cytoplasmic localization of PP2A-B56 $\delta$  in anaphase.** HeLa cells expressing an EGFP-tagged PP2A-B56 $\delta$  subunit were imaged at 1-min intervals for 20 min from 1 min before the onset of anaphase using a spinning-disk confocal microscope. A maximum intensity projection of the GFP signal, 17 planes spaced by 0.6  $\mu$ m through the cell volume, is shown with gray-scale and a heatmap scale together with a single brightfield image taken at the cell equator. PP2A-B56 $\delta$  was present in the cytoplasm during exit from mitosis and cytokinesis. Time is in minutes relative to metaphase-anaphase transition. Supplemental to Fig. 1 E. Bar, 10  $\mu$ m.

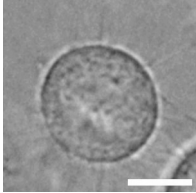

Video 5. **Central spindle formation in control cells.** HeLa cells stably expressing EGFP-tubulin (green) and mCherry-histone H2B (red) were treated with control siRNA. Images corresponding to 17 planes spaced by 0.6  $\mu$ m through the cell volume were collected at 1-min intervals for 20 min from 1 min before the onset of anaphase using a spinning-disk confocal microscope. A maximum intensity projection is shown together with a single brightfield image taken at the cell equator. Time is in minutes relative to metaphase-anaphase transition. Supplemental to Fig. 5 A. Bar, 10  $\mu$ m.

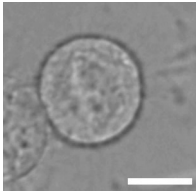

Video 6. **Central spindle formation in PP2A-B56 $\gamma$  and - $\epsilon$ -depleted cells.** HeLa cells stably expressing EGFP-tubulin (green) and mCherry-histone H2B (red) were depleted of PP2A-B56 $\gamma$  and - $\epsilon$  using siRNA. Images corresponding to 17 planes spaced by 0.6  $\mu$ m through the cell volume were collected at 1-min intervals for 20 min from 1 min before the onset of anaphase using a spinning-disk confocal microscope. A maximum intensity projection is shown together with a single brightfield image taken at the cell equator. Time is in minutes relative to metaphase-anaphase transition. Supplemental to Fig. 5 A. Bar, 10  $\mu$ m.
